# Supplementary material for: The Vi Capsular Polysaccharide of Salmonella Typhi Promotes Macrophage Phagocytosis by Binding the Human C-Type Lectin DC-SIGN
Source: PubMed Central journal article supplement (PMC9765441; doi:10.1128/mbio.02733-22), 2022-10-26
Supplement: mbio.02733-22-s0001.pdf [file mbio.02733-22-s0001.pdf]

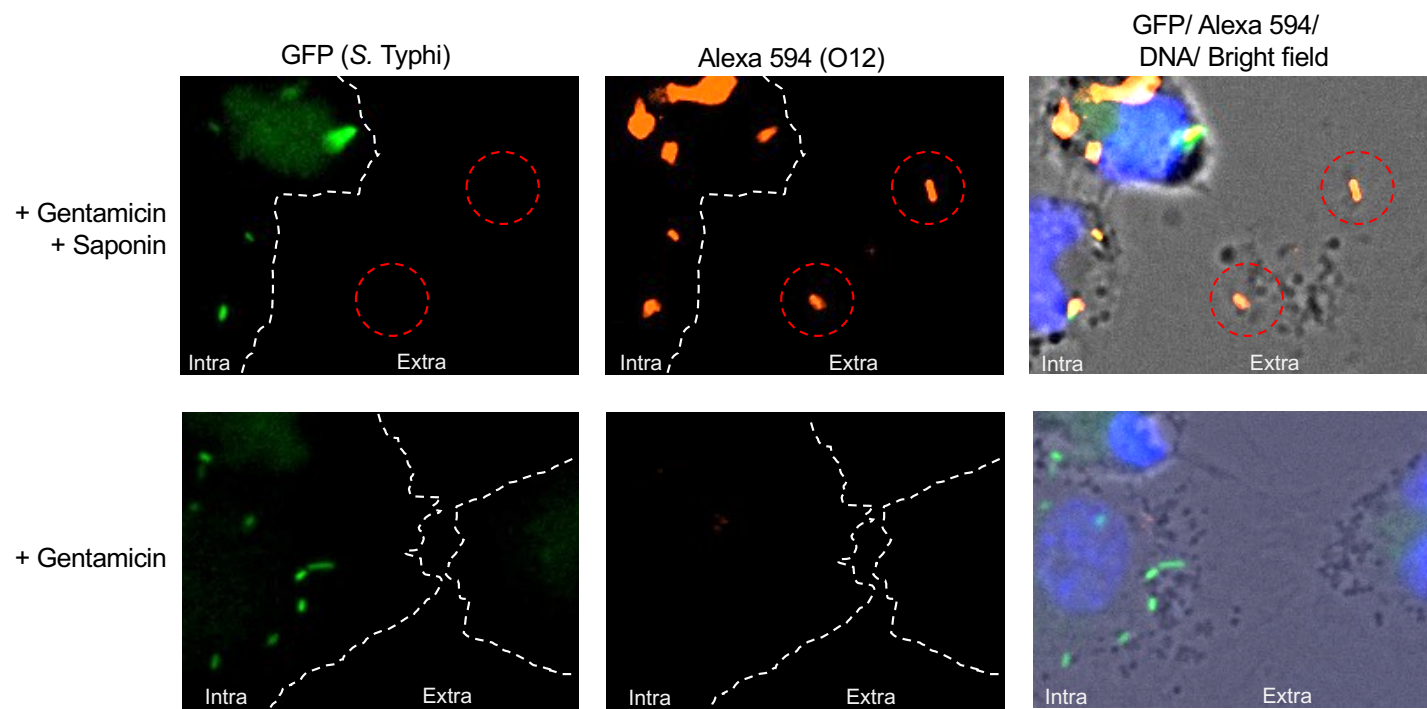

Supplementary figure S1
